# Supplementary material
Source: PubMed Central journal article supplement (PMC3650537)
Supplement: JB.02255-12_zjb999092583so1.pdf [file JB.02255-12_zjb999092583so1.pdf]

## Supplemental Materials

### MATERIALS AND METHODS

#### *RT-PCR to evaluate gene expression*

To examine expression of *gap2* and *gap3*, total RNA was extracted from *S. parasanguinis* wild-type, *gap* mutants, and Gap3 overexpressing strains. Standard protocol for ZR RNA MiniPrep (Zymo Research) was followed, with the exception of the lysing step in which 1.5 ml of pelleted cells (OD<sub>470</sub>= 0.6) were vortexed in 1 mL of TRIzol® Reagent (Invitrogen) and Lysing Matrix B (MP Bio) for 5 minutes on high. Following extraction, RNA was treated with RQ1 DNase (Promega) and then subjected to reverse transcription using M-MLV (Promega) standard protocol and Random Primers (Promega) for cDNA synthesis. cDNA was subsequently used as a template for PCR amplification using a *gap2* primer set (Gap2-1191-F, Gap2-1584-R) and a *gap3* primer set (Gap3-1-F, Gap3-534-R). Another primer set (Gap3-1-F, GFP-101-R) was used to detect only Gap3 expressed by the plasmid in the overexpressing strains. Expression of *fimA* was also detected by RT-PCR with FimA-1-F and FimA-465-R, serving as a control.

### TABLES

**Table S1.** Primers used in this study

| <b>Primers</b> | <b>Sequences</b>                            |
|----------------|---------------------------------------------|
| Gap2-1191-F    | GATCGTCGACCCGACGGCTGTAATTGTAGGTAAG          |
| Gap2-1584-R    | GGCGCCGGGATCCTCTTCCAAACTGATCTTCTAGAAT       |
| Gap3-1-F       | GCGCCGGCCATGGATGACTAAACAGTTAATTTCTG         |
| Gap3-534-R     | GCGGCGCCGGCGGATCCAATATATTCTATTTAAATTTTTCACC |
| GFP-101-F      | TCACCCTCTCCACTGACAGAAAATTTGTG               |
| FimA-1-F       | GGCATGAAAAAATCGCTTCTGTCCTCGCCC              |
| FimA-465-R     | GGCAATGTTTTAGCGTAGAGGATCCCG                 |

## FIGURES

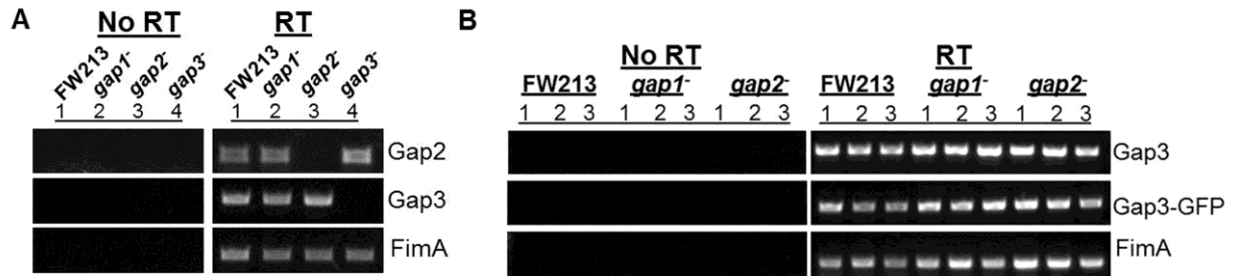

**Figure S1.** No difference is observed in transcription of *gap2* and *gap3* among strains. RT-PCR analysis in wild-type, *gap* mutants, and Gap3 overexpressing strains. **(A)** Strains include FW213 wild-type and insertional mutants of *gap1*, *gap2*, and *gap3*. Transcription levels of *gap2* and *gap3* were determined. **(B)** Strains include FW213 wild-type, *gap1* mutant, and *gap2* mutant overexpressing Gap3 alone (lanes 1, 4, and 7), Gap2 and Gap3 (lanes 2, 5, and 8), or Gap1, Gap2, and Gap3 (lanes 3, 6, and 9) in the pIB184-*gfp* vector, where Gap3 is tagged with GFP in all strains. Transcription levels of *gap3* and *gap3* transcribed from the plasmid (*gap3-gfp*) were determined. Transcription of *FimA* was used as a control.
